# Supplementary material for: Phase transition kinetics of LiNi0.5Mn1.5O4 analyzed by temperature-controlled operando X-ray absorption spectroscopy
Source: Royal Society of Chemistry journal article supplement (doi:10.1039/c5cp05535k), 2015-12-21
Supplement: c5cp05535k1.pdf [file c5cp05535k1.pdf]

**Phase transition kinetics of  $\text{LiNi}_{0.5}\text{Mn}_{1.5}\text{O}_4$  analyzed by temperature-  
controlled operando X-ray absorption spectroscopy**

Ikuma Takahashi, Hajime Arai, Haruno Murayama, Kenji Sato, Hideyuki Komatsu, Hajime Tanida,

Yukinori Koyama, Yoshiharu Uchimoto, and Zempachi Ogumi

### Equations used for obtaining rate constants

Charging process:

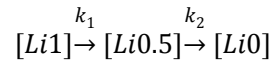

$$-\frac{d}{dt}[Li1] = k_1[Li1]$$

$$\frac{d}{dt}[Li0.5] = k_1[Li1] - k_2[Li0.5]$$

$$\frac{d}{dt}[Li0] = k_2[Li0.5]$$

These equations can be solved and the concentration of [Li1], [Li0.5] and [Li0] at time t can be obtained as follows, where [Li1]<sub>0</sub> is the initial concentration of Li1.

$$[Li1] = [Li1]_0 e^{-k_1 t}$$

$$[Li0.5] = [Li1]_0 \left( \frac{k_1}{k_2 - k_1} \right) (e^{-k_1 t} - e^{-k_2 t})$$

$$[Li0] = [Li1]_0 \left\{ 1 - \frac{1}{k_2 - k_1} (k_2 e^{-k_1 t} - k_1 e^{-k_2 t}) \right\}$$

Discharging process:

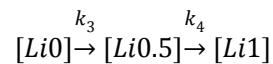

$$-\frac{d}{dt}[Li0] = k_3[Li0]$$

$$\frac{d}{dt}[Li0.5] = k_3[Li0] - k_4[Li0.5]$$

$$\frac{d}{dt}[Li1] = k_4[Li0.5]$$

They can be solved similarly and the concentration of [Li0], [Li0.5] and [Li1] can be obtained as follows with the initial concentration of Li0  $[Li0]_0$ .

$$[Li0] = [Li0]_0 e^{-k_3 t}$$

$$[Li0.5] = [Li0]_0 \left( \frac{k_3}{k_4 - k_3} \right) (e^{-k_3 t} - e^{-k_4 t})$$

$$[Li1] = [Li0]_0 \left\{ 1 - \frac{1}{k_4 - k_3} (k_4 e^{-k_3 t} - k_3 e^{-k_4 t}) \right\}$$

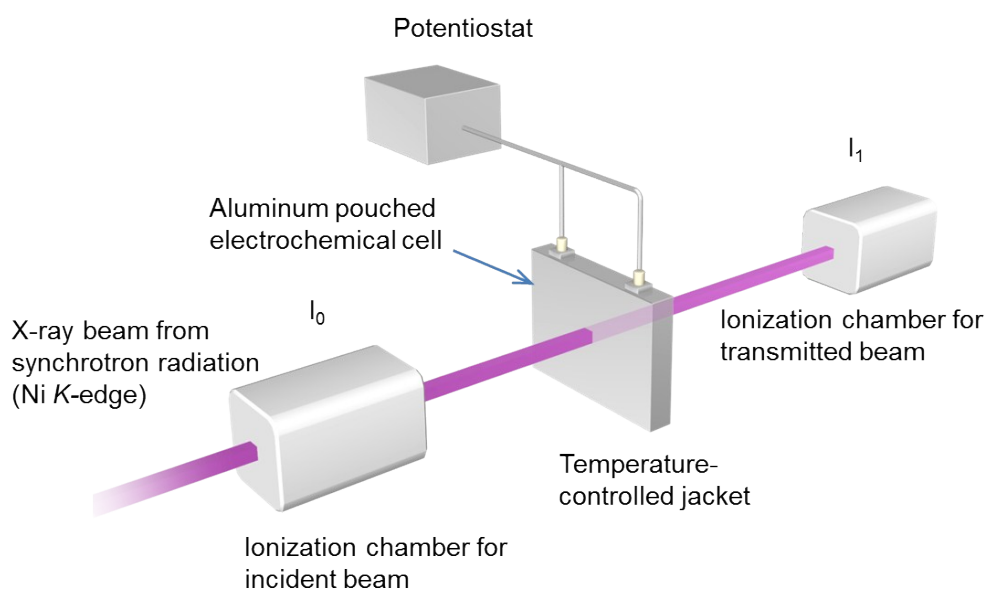

Figure S1 Temperature-controlled *operando* XAS measurement system.

(a)

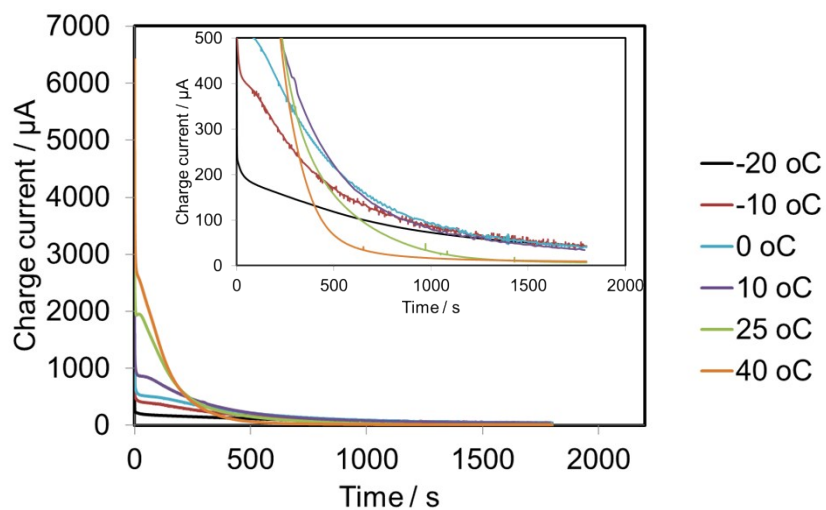

(b)

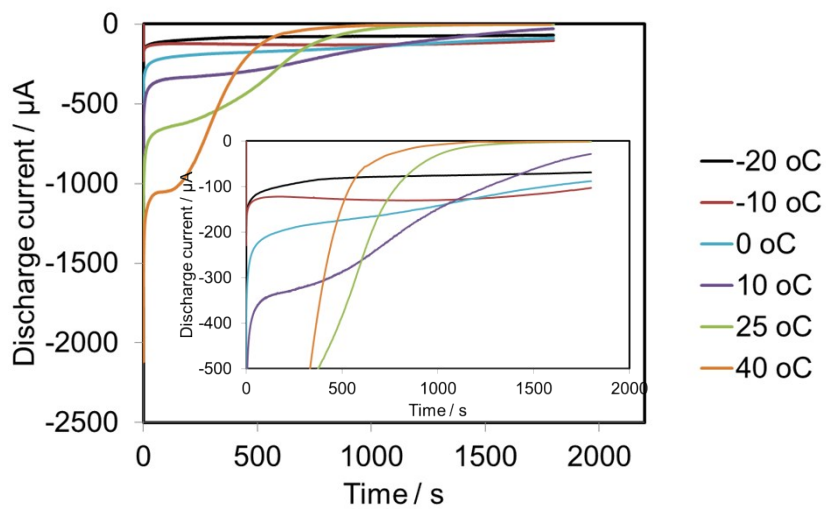

Figure S2 Current-time curves in potential step (a) charging and (b) discharging experiments.

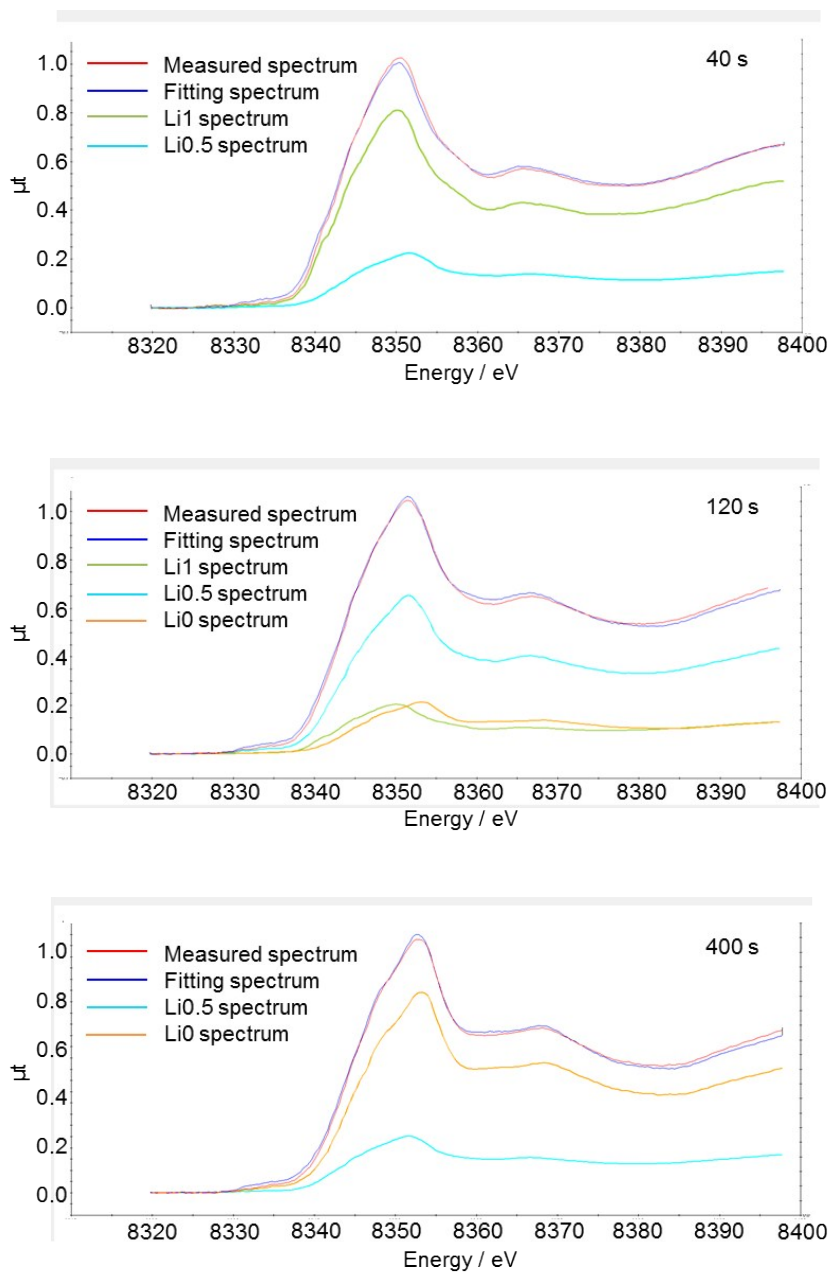

Figure S3 Examples of XANES spectra obtained at 40 s, 120 s and 400 s after potential step charging at 40 °C.
